## Abstract

Extracellular adenosine production is crucial for host resistance against *Streptococcus pneumoniae* (pneumococcus) and is thought to primarily affect antibacterial immune responses by neutrophils. However, whether extracellular adenosine alters direct host-pathogen interaction remains unexplored. An important determinant for lung infection by *S. pneumoniae* is its ability to adhere to the pulmonary epithelium. Here we explored whether extracellular adenosine can directly impact bacterial adherence to lung epithelial cells. We found that treatment of cultured human pulmonary epithelial cells with adenosine significantly reduced the ability of pneumococci to bind to these cells. Extracellular adenosine reduced *S. pneumoniae* adherence by acting on the host. Inhibition of adenosine receptor signaling using a pan antagonist blocked adenosine's ability to inhibit bacterial binding while treatment with a pan adenosine receptor agonist mimicked the effects of adenosine. Using specific receptor agonists, we found that signaling through the A1 adenosine receptor mediated the reduction in bacterial binding to pulmonary epithelial cells. A1 receptor signaling inhibited bacterial binding by reducing the expression of platelet-activating factor receptor, a host protein used by *S. pneumoniae* to adhere to host cells. *In vivo*, A1 was expressed in the lungs and was required for control of pneumococcal pneumonia as inhibiting it resulted in an increase in bacterial numbers and reduced host survival in mice. As *S. pneumoniae* remain a leading cause of community-acquired pneumonia in the elderly, we explored the role of A1 in the age-driven susceptibility to infection. We found no difference in

A1 pulmonary expression in young versus old mice. Strikingly, triggering A1 signaling boosted the ability of old mice to control *S. pneumoniae* pulmonary infection. A1 agonist-treated old mice displayed lower bacterial loads, reduced clinical signs of disease and prolonged survival. This study demonstrates a novel mechanism by which extracellular adenosine modulates resistance to lung infection by targeting bacterial-host interactions.

## Author Summary

*Streptococcus pneumoniae* (pneumococcus) can cause life-threatening invasive infections, such as pneumonia, bacteremia and meningitis worldwide, particularly in the elderly. Understanding the pathways governing bacterial-host interactions can help us design therapies to better fight infection. Extracellular adenosine, a signaling molecule produced by the host, is crucial for resistance against pneumococcal pneumonia. Extracellular adenosine is thought to control the host immune responses, however, whether it affects host-pathogen interaction remains unexplored. Here we found that extracellular adenosine signaling directly affects pneumococcal-epithelial cell interactions. The ability of *S. pneumoniae* to adhere to epithelial cells is important for establishing lung infection. Extracellular adenosine signaling through A1, one of its receptors expressed in the lungs, inhibited the ability of *S. pneumoniae* to adhere to lung epithelial cells. Extracellular adenosine acted by reducing the expression of a host protein used by *S. pneumoniae* to adhere to epithelial cells. Importantly, A1 signaling was crucial for controlling lung infection by *S. pneumoniae* in young

mice and could be targeted to boost the ability of old mice to fight lung infection. This study may have future implications for using clinically available adenosine-based therapies to boost the resistance of vulnerable hosts like the elderly to pneumococcal pneumonia.

## Introduction

*Streptococcus pneumoniae* (pneumococcus) typically reside asymptotically in the nasopharynx of healthy individuals but can cause life-threatening invasive diseases resulting in more than 1 million deaths per year worldwide (1, 2). The majority of invasive pneumococcal infections occur in elderly individuals  $\geq 65$  years of age (3). As the number of elderly individuals is projected to double in the coming decades, reaching 2 billion by 2050, invasive pneumococcal infections pose a serious health concern and an economic burden which calls for novel interventions to fight this disease (4).

Lung infection is the most common form of invasive pneumococcal disease (5) and the ability of *S. pneumoniae* to bind to and invade the airway epithelium is a crucial step for invasive infection (1, 2). *S. pneumoniae* express several factors that mediate binding to mammalian host cells and in fact many bacterial virulence elements with diverse functions also double as adherence factors (1, 2). This includes phosphorylcholine displayed on the bacterial cell wall that mimics moieties found on host platelet-activating factor (PAF) and allows the bacteria to bind to the host PAF receptor (6, 7). Platelet-activating factor receptor (PAFR) is expressed on airway epithelial cells (8-10) and is upregulated during

pneumococcal pneumonia (8). PAFR mediates pneumococcal adhesion to airway epithelial cells (7) and pharmacologically blocking this receptor decreased bacterial binding *in vitro* (7, 11). Importantly blocking PAFR also attenuated *S. pneumoniae* infection in animal models and PAFR<sup>-/-</sup> mice were more resistant to pneumococcal lung infection (7, 12).

The extracellular adenosine pathway is an important regulator of host defense against *S. pneumoniae* infection (13, 14). Upon cellular injury including that caused by infection, ATP is released from cells and converted to adenosine by the sequential action of two extracellular enzymes, CD39, which metabolizes ATP to AMP, and CD73 that de-phosphorylates AMP to adenosine (15).

Extracellular adenosine can then act as a signaling molecule by binding to and activating one of four G-protein coupled adenosine receptors, A1, A2A, A2B and A3 (15). The enzymes and receptors of the extracellular adenosine pathway are expressed by lung epithelial cells (16) and were shown to control acute lung injury (17), ciliary motility (18), wound healing (19), activation of ion channels (20), surfactant secretion (21), fibronectin release (22), mucin expression (23) and production of cytokines (24).

Extracellular adenosine is thought to regulate host resistance to lung infections by regulating recruitment and function of innate immune cells (13, 25-29). For example, we previously found that CD73 deficient mice had a thousand-fold more *S. pneumoniae* in their lungs as compared to wild type controls following lung challenge (13). However, those studies did not assess whether decreased adenosine functioned to enhance bacterial binding to lung epithelial

cells. Here, we report that adenosine A1 receptor signaling inhibited binding of *S. pneumoniae* to human lung epithelial cells *in vitro* by reducing the expression of PAFR on infected host cells. Signaling via the A1 receptor was further required for control of bacterial numbers *in vivo* upon lung infection of mice. Importantly triggering A1 receptor signaling reversed the susceptibility of old mice to *S. pneumoniae* infection. This study identifies a novel mechanism by which adenosine regulates host resistance to bacterial pneumonia and demonstrates for the first time the feasibility of targeting this pathway to boost resistance of vulnerable hosts against pneumococcal pneumonia.

## Results

### *Adenosine and AMP, but not ATP inhibits binding of S. pneumoniae to H292 pulmonary epithelial cells*

We previously found that extracellular adenosine was required for host resistance against *S. pneumoniae* lung infection (13). Mice lacking CD73, an enzyme required for extracellular adenosine production, had significantly higher bacterial burdens in their lungs as compared to wild type mice (13). Since a crucial step for establishing lung infection is the ability of *S. pneumoniae* to bind to the pulmonary epithelium (1, 2), we tested whether extracellular adenosine directly modulated pneumococcal binding to respiratory epithelial cells. To test that, human H292 lung epithelial cells were treated with extracellular adenosine or vehicle control, infected with *S. pneumoniae* and the amount of bacteria that adhered to the host cells measured. We found that incubation with 100 $\mu$ M of

extracellular adenosine, which is close to the alveolar concentration of adenosine in human subjects (30), significantly decreased the amount of adherent bacteria that were attached to the lung epithelial cells by 3-fold (Fig 1A). This was not due to direct toxicity to the bacteria, as adenosine at the concentration we tested had no effect on bacterial growth as previously described (13) or bacterial viability within the timeframe of this assay (Fig S1).

Adenosine in the extracellular milieu is produced when ATP that has leaked from damaged cells is metabolized by two surface enzymes, CD39 that converts ATP to AMP, and CD73, an ecto-5'-nucleotidase that de-phosphorylates AMP to adenosine (15). When we measured the expression of these enzymes in H292 cells, we found that mRNA levels of CD73 were readily detectable. However, CD39 mRNA levels were very low (Fig 1B). Consistent with that, CD73 protein was abundantly expressed on H292 cells, while CD39 was not detectable (Fig 1C). To confirm that the antibody we used for detection of CD39 was functional, we stained PMNs isolated from human donors as a positive control and were able to easily detect CD39 on those cells (Fig 1C).

Since H292 cells expressed CD73, but not CD39, we hypothesized that AMP will also be able to decrease binding of *S. pneumoniae* to these cells, since CD73 can convert it to adenosine, while ATP will have no effect since CD39 is not present to initiate its dephosphorylation into adenosine. When we performed the binding assays, we found that treatment of H292 cells with adenosine or AMP significantly reduced the percentage of bacteria that bound when compared to vehicle control treatment (Fig 1D). However, we did not observe any significant

effect on bacterial binding to host cells upon treatment with ATP. Taken together, these data suggest that extracellular adenosine production inhibits the ability of *S. pneumoniae* to bind to lung epithelial cells *in vitro*.

# *Extracellular adenosine receptor signaling is required for reduction of S. pneumoniae binding to pulmonary epithelial cells*

Extracellular adenosine can directly alter bacterial virulence (31, 32) and also signal in the mammalian host via four known receptors (15). Therefore we tested whether adenosine was altering bacterial binding by acting on the bacteria, the host or both. Capsule expression regulates the ability of *S. pneumoniae* to bind host cells (33-37). However, treatment of *S. pneumoniae* with adenosine had no effect on expression of the capsular polysaccharide (Fig S2A). As expected capsular deficient ( $\Delta cps$ ) bacteria bound significantly better than wild type (WT) bacteria but adenosine treatment of H292 cells still reduced binding of  $\Delta cps$  *S. pneumoniae* by 3-fold, comparable to its effect on WT bacteria (Fig S2B). Further, when we pre-treated *S. pneumoniae* only with adenosine, we saw no consistent decrease in bacterial binding (Fig 2). This suggests that adenosine was not mediating its effect through acting on the bacteria.

To test if adenosine was mediating its effect by acting on host cells, we blocked adenosine receptor signaling using a pan-adenosine receptor inhibitor CGS 15943. We found that the ability of adenosine to blunt bacterial binding to H292 cells was abrogated when adenosine receptors signaling was blocked (Fig 2). Further, treatment of H292 cells with NECA, a pan adenosine receptors



agonist, mimicked the effects of adenosine, where bacterial binding was reduced to 39% compared to the vehicle treated controls (Fig 2). The drugs had no direct effect on bacterial viability as previously shown (13). These findings suggest that extracellular adenosine signaling in mammalian hosts inhibits the ability of *S. pneumoniae* to bind to lung epithelial cells.

### *H292 cells express extracellular adenosine receptors*

There are currently four known adenosine receptors A1, A2A, A2B and A3. First, we wanted to determine which adenosine receptors are expressed by H292 cells and whether their expression is affected by bacterial infection. To do so, we measured expression of adenosine receptors mRNA as is commonly done in most studies (20, 22, 24, 38). mRNA for A1, A2A and A2B receptors was readily detectable, while A3 mRNA was very low (Fig 3A). Upon infection with *S. pneumoniae*, we saw a slight but not significant increase in mRNA levels for A1, A2A and A2B with no change in mRNA levels of A3 as compared to uninfected controls (Fig 3B). We then determined protein levels by flow cytometry and found that H292 cells expressed all four adenosine receptors and that A2A was more highly expressed on these cells compared to the other three receptors (Fig 3C). Adenosine receptor protein levels were not altered upon infection of H292 cells with *S. pneumoniae* (Fig 3C). We further confirmed our results with western blots and found that similar to flow cytometry, all 4 adenosine receptors were detected and *S. pneumoniae* infection slightly (but not significantly) increased levels of A1 by 1.4-fold but did not alter the expression of the other receptors (Fig 3D-E).

These results demonstrate that receptors for extracellular adenosine are expressed in H292 pulmonary epithelial cells and that infection does not significantly alter their levels.

# *A1 receptor signaling inhibits binding of S. pneumoniae to pulmonary epithelial cells*

Next, we wanted to identify which adenosine receptor(s) was required for inhibiting bacterial binding to lung epithelial cells. These receptors bind to adenosine with different affinities where the higher affinity receptors A1 and A3 have an  $EC_{50} < 0.5 \mu M$  whereas the intermediate affinity A2A has an  $EC_{50} > 0.6 \mu M$  and the low affinity A2B an  $EC_{50}$  between  $16-64 \mu M$  (15). To probe which receptor(s) is involved, we did a dose response, testing the effect of 100, 10, 1 and  $0.1 \mu M$  of adenosine on bacterial binding to H292 cells. We found that even lower concentrations of adenosine at 10 and  $1 \mu M$  were as equally efficient at decreasing adherence of *S. pneumoniae* as  $100 \mu M$ , where bacterial binding was reduced to 35% relative to vehicle treated controls (Fig 4). These results suggested that the higher affinity adenosine receptors A1, A2A or A3 but not the low affinity receptor A2B were mediating the effect on bacterial binding observed.

To pinpoint the exact receptor involved, we treated H292 cells with specific agonists for each of the different receptors. Since mRNA levels of A3 (Fig 3A) were barely detectable, we decided to proceed with testing the role of the other three receptors. Consistent with the results of adenosine doses, agonism of A2B receptor on H292 cells did not result in inhibition of *S.*

*pneumoniae* binding to these pulmonary epithelial cells and the percentage of bacteria bound to treated cells were not statistically different than those bound to control treated cells (Fig 4). Similarly, treatment with the A2A receptor agonist did not alter bacterial binding to H292 cells (Fig 4). In contrast treatment with the A1 receptor agonist significantly reduced bacterial binding to H292 cells in a dose-dependent manner (Fig 4). We observed a 3-fold and 2-fold reduction in the amount of bound bacteria in comparison to control treated cells when cells were treated with 10 or 1 nM (corresponding to respectively 10x and 1x the drug's reported  $K_i$  (Fig 4). None of the adenosine receptor agonists had a direct effect on bacterial viability (Fig S1). These findings suggest that specific signaling via the A1 receptor reduces binding of *S. pneumoniae* to pulmonary epithelial cells.

#### *A1 receptor signaling reduces expression of PAFR on infected pulmonary epithelial cells*

Next we wanted to identify the mechanisms by which adenosine regulated bacterial binding to lung epithelial cells. *S. pneumoniae* is known to co-opt several well-characterized host proteins to adhere to mammalian cells including the Polymeric Immunoglobulin Receptor (PIGR) (39) and PAFR (7). Therefore, we examined the effect of adenosine on the expression of these host proteins by flow cytometry at baseline and during infection. As a control, we also examined the expression of ICAM-1 a host protein whose expression is upregulated during infection but is not thought to be a receptor for *S. pneumoniae* (40). We found that consistent with previous studies, infection of H292 lung epithelial cells by *S.*

*pneumoniae* increased the expression of all three proteins we examined (Fig 5A-C). Treatment of H292 cells with adenosine had no significant effect on the expression of ICAM-1 or PIGR (Fig 5A-B). In contrast treatment of the epithelial cells with adenosine moderately, but significantly reduced expression of PAFR on resting uninfected epithelial cells (Fig 5C). Further treatment with adenosine or A1 receptor agonist prevented upregulation of PAFR in response to infection and *S. pneumoniae* infected H292 cells treated with these compounds had significantly lower expression of PAFR as compared to vehicle treated controls (Fig 5C).

To test if adenosine was mediating its effect through decreasing expression of PAFR, we blocked PAFR signaling using the specific inhibitor Apafant. We found that as expected (7, 11), inhibition of PAFR signaling significantly reduced the ability of *S. pneumoniae* to bind to H292 cells (Fig 6). Addition of the A1 receptor agonists or adenosine did not further decreased bacterial binding in the presence of the PAFR inhibitor (Fig 6). These findings suggest that A1 adenosine receptor signaling reduces bacterial binding to lung epithelial cells by targeting PAFR receptor.

# *A1 receptor signaling is required for host resistance to S. pneumoniae lung infection*

We next wanted to confirm the relevance of our findings during lung infection *in vivo* using a mouse model. First we checked for the expression of adenosine receptors in the lungs of mice and found that consistent with previous

reports (20), A1 and A2A were highly expressed, while less A2B and A3 was detected (Fig 7A-B). As we observed *in vitro*, *S. pneumoniae* infection did not affect the expression of adenosine receptors in mouse lungs (Fig 7A-B).

We then evaluated the role of A1 receptor signaling in host resistance to infection. We treated mice with i.p. injections of DPCPX, a A1 pharmacological inhibitor that is active *in vivo* prior to infection. The mice were then challenged intra-tracheally with  $\sim 1 \times 10^4$  CFU, a low non-lethal dose of *S. pneumoniae* (13, 41), and lung bacterial burdens were determined 6 hours post-infection. Since extracellular adenosine modulates host resistance to infection via regulating the inflammatory immune response following infection (13, 25-29), we chose to challenge mice with this low dose of bacteria and examine bacterial numbers in the lungs at this early time point, conditions under which we previously found overt pulmonary inflammation is not yet triggered (13). We further confirmed that the A1 inhibitor had no effect on the baseline numbers of neutrophils, macrophages and T cells in the lungs (data not shown). We found that inhibition of A1 receptor signaling *in vivo* resulted in a significant  $\sim 10$ -fold increase in bacterial numbers in the lungs following pulmonary challenge (Fig 8A). At 6 hours post infection, the infection was still localized to the lungs and had not spread systemically. However, when we compared bacteremia at 24 hours following infection, we found that while none of the control mice were bacteremic, 25% of A1 inhibited mice had systemic spread of the infection (Fig 8B). Importantly, inhibition of A1 significantly resulted in increased signs of clinical disease (Fig 8C) and significantly more host death when mice were challenged at an

otherwise non-lethal dose (Fig 8D). These findings demonstrate that specific signaling via the A1 receptor is required for early host resistance to *S. pneumoniae* lung infection.

### *Triggering A1 receptor signaling boosts resistance against S. pneumoniae lung infection in aged hosts*

As pneumococcal infections are particularly a problem in the elderly, we examined the effect of aging on adenosine receptor expressions in the lung. We compared pulmonary expression levels of the adenosine receptors in young (2 months) versus old (18-22 months) mice. We found that there were no significant differences in the expression of any of the adenosine receptors in the lungs of old mice as compared to young controls either at baseline or following lung challenge with *S. pneumoniae* (Fig 7B).

We previously found that mice mimic the age-driven susceptibility to *S. pneumoniae* lung infection observed in humans (41). To test whether A1 receptor can boost the resistance of old mice to lung infection, mice were treated i.p. with 2-Chloro-N6-cyclopentyladenosine, the A1 agonist prior to infection. Mice were then challenged intra-tracheally with *S. pneumoniae*, and bacterial burdens in the lung were determined 6 hours post-infection. As expected, vehicle control treated old mice were more susceptible to pneumococcal infection and had ~ 100-fold more bacteria in their lungs at 6 hours (Fig 8A) and blood at 24 hours (Fig 8B) as compared to young controls. Strikingly, treatment with the A1 agonist boosted the resistance of old mice to infection. A1 agonist treated old mice had 70-fold less

bacteria in their lungs, a bacterial burden that was indistinguishable from that of control treated young mice (Fig 8A). Further, by 24 hours post infection, old mice given the A1 agonist had significantly less bacteria in their systemic circulation when compared to controls (Fig 8B). Importantly, triggering A1 significantly decreased clinical sign of sickness (Fig 8C) and slightly delayed host death and boosted survival of old mice (Fig 8E). These data demonstrate that A1 receptor can be targeted to boost the innate resistance of aged hosts to *S. pneumoniae* lung infection.

## Discussion

The role of the extracellular adenosine pathway in modulating host resistance against pulmonary pathogens is becoming better appreciated. Previous studies using murine models of infection showed that deficiency of adenosine A2B or A1 receptors was protective against *Klebsiella pneumoniae* (28) and influenza (26) lung infection respectively, whereas overexpression of CD39 on airway epithelial cells promoted *Pseudomonas aeruginosa* clearance from the lungs (25). We previously found that extracellular adenosine production by CD73 was crucial for control of pulmonary bacterial numbers and systemic spread following lung challenge with *S. pneumoniae* (13). In all of the above studies, extracellular adenosine was believed to modulate pathogen clearance by either controlling the recruitment of immune cells, particularly neutrophils and/or regulating their antimicrobial activity (13, 25-29). Here we show that apart from its effect on innate immune cells, extracellular adenosine modulates host resistance

by acting on pulmonary epithelial cells, targeting expression of mammalian proteins co-opted by *S. pneumoniae* as receptors and reducing the ability of bacteria to bind host cells.

Few studies have examined the effect of adenosine on bacterial infection of epithelial cells from different organs (31, 32, 42-44). Adenosine signaling via the A2B receptor inhibited intracellular persistence of *Chlamydia trachomatis* in cervical epithelial cells (44) while A2A receptor promoted intracellular replication of *Porphyromonas gingivalis* in gingival epithelial cells (43). In intestinal epithelial cells, adenosine promoted bacterial infections, where addition of exogenous adenosine increased adhesion of *Salmonella* to gut epithelial cells (42), and expression of the adenosine producing enzyme CD73 on intestinal epithelial cells promoted the intracellular replication as well as translocation and systemic spread of *Salmonella* across the gut epithelium (32). Similarly, adenosine altered the adhesion patterns of enteropathogenic *Escherichia coli* to gut epithelial cells and promoted intestinal infection *in vivo* (31). Thus the effect of adenosine on bacterial infection of the epithelium may be organ and adenosine-receptor specific. We demonstrated here that adenosine signaling via the A1 receptor inhibited adherence of *S. pneumoniae* to H292 epithelial cells and reduced lung infection *in vivo*, which is to our knowledge, the first report to show an effect of the extracellular adenosine pathway on bacterial infection of pulmonary epithelial cells. In certain infections adenosine had a direct effect on bacterial viability and expression of virulence genes (31, 32). However, that was not the case here as adenosine neither affected *S. pneumoniae* viability or expression of capsular



polysaccharide, a major determinate of bacterial adhesion, nor did treatment of the bacteria alone alter their ability to adhere to lung epithelial cells.

Purinergic signaling plays a crucial role in regulating responses in the airways (16). We found here that adenosine was exerting its effect on bacterial binding through signaling via adenosine receptor A1 on host epithelial cells. The pulmonary epithelial cells used *in vitro* in this study were H292 human lung epithelial cells that are a mix of type I and type II pneumocytes (45). We found that H292 cells expressed mRNA for A2B, A1 and A2A in decreasing levels while A3 levels were extremely low. This is consistent with previous studies with A549 cells, a type II pneumocyte cell line (22) as well as primary bronchial epithelial cells (24). Similar to other studies, despite differences at the mRNA levels, we could detect protein expression for all four adenosine receptors (38). Lung epithelial cells are also known to express P2 purinergic receptors that respond to ADP and/or ATP (16) and ATP and/or ADP impaired replication of *Chlamydia trachomatis* in cervical epithelial cells (46). However, addition of ATP did not alter *S. pneumoniae* binding to the lung epithelial cells *in vitro* while AMP significantly decreased bacterial binding. We believe that AMP but not ATP decreased bacterial binding since H292 cells express CD73 that can dephosphorylate AMP into adenosine but lack CD39 that is required for converting ATP into AMP. *In vivo*, the ability of epithelial cells to produce adenosine themselves may not be relevant as adenosine can be produced by many cells that influx into sites of infection and damage including immune cells (47).

Here, A1 receptor signaling was important for control of *S. pneumoniae* lung infection *in vivo*. We found that A1 and A2A receptors were expressed in mouse lungs, while expression of A2B and A3 was lower, similar to what has been described before (20). A1 receptor is known to play an important role in acute lung injury by regulating inflammation, particularly pulmonary influx of neutrophils (26, 48-50). While we cannot differentiate whether the effect of adenosine *in vivo* is due to a direct effect on the lung epithelium or innate immune cells, we used a low dose infection and examined bacterial burdens early on after 6 hours of infection since we previously found that at this dose and this time point very little PMNs influx into the airways (13).

We found that adenosine and A1 receptor signaling down regulated expression of PAFR on *S. pneumoniae* infected lung epithelial cells. PAFR is a host protein used by *S. pneumoniae* to adhere to airway epithelial cells (7). When PAFR was inhibited, we found that bacterial binding to the epithelium was reduced by half, consistent with previous reports (7, 11). Triggering A1 receptor did not further reduce binding when PAFR was inhibited, suggesting that signaling via A1 receptor reduces pneumococcal binding via targeting PAFR. PAFR is expressed in the lungs (8) and impairs host resistance against pneumococcal pneumonia (7, 12, 51). We observed that PAFR expression is up regulated on lung epithelial cells upon infection, consistent with previous reports (8). Therefore the reduced expression of PAFR in infected cells treated with adenosine or the A1 receptor agonist may be an indirect effect of less bacteria bound, however, we believe that this is unlikely to be a simple reflection of bound

bacteria since expression of both ICAM-1 and PIGR, two other host proteins up regulated upon infection were not affected by adenosine. It is more likely that adenosine is indirectly regulating PAFR expression by controlling inflammatory responses of epithelial cells to infection. Previous studies found that PAFR was up regulated on epithelial cells activated by cytokines or other factors, which enhances bacterial binding (7, 10, 52), and adenosine receptor signaling controlled cytokine responses by epithelial cells (24). This could explain why we only see A1 receptor signaling reducing expression of PAFR in *S. pneumoniae* infected but not resting epithelial cells. In addition to bacterial adherence to the lung epithelium, PAFR also has a role in pneumococcal invasion of epithelial and endothelial cells and systemic spread of the infection from the lungs to the circulation *in vivo* (7, 53, 54). However, we did not detect any bacteremia in either A1 inhibited or control treated mice at the early 6-hour time point following *S. pneumoniae* lung challenge.

Changes in extracellular adenosine production, metabolism and signaling occur with aging (55-57). This is reflected by changed levels and activity of the EAD-producing and degrading enzymes (58, 59), altered expression of adenosine receptors (56), and an overall decline in G-protein coupled receptor signaling (60). This pathway has been reported to play an important role in the age-related decline of brain (58), metabolic (61) and cardiac function (56), and importantly, can be targeted to reverse this decline in animal models (62-64). However, the role of the extracellular adenosine pathway in age-driven susceptibility to infections remains completely unexplored. We found here that

there was no difference in the expression levels of adenosine receptors in the lungs of young versus old mice. Strikingly, treatment of old mice with an A1 receptor agonist significantly boosted their resistance to pneumococcal lung infection where they were able to control early pulmonary bacterial burdens, had reduced systemic spread of the infection and extended survival compared to control treated mice. PAFR expression was reported to be upregulated at baseline in the lungs of old mice (9). Therefore it is possible that triggering A1 receptors boots the resistance of aged hosts to *S. pneumoniae* by reducing PAFR expression in the lungs. These findings demonstrate that targeting the adenosine pathway may be a feasible strategy to reverse the innate susceptibility of aging to lung infection.

*S. pneumoniae* binds to PAFR via phosphorylcholine displayed on the bacterial cell wall that mimics moieties found on host platelet-activating factor. This form of molecular mimicry is shared by other pathogens (65), including *Haemophilus influenzae* (66), *Neisseria* (67, 68), *Pseudomonas aeruginosa* (69), *Acinetobacter baumannii* (70) and is used by bacteria to bind to PAFR and adhere to host cells but can also regulate inflammatory responses in the host (65, 71). Intriguingly a pilot study found that single nucleotide polymorphisms in *PTAFR* gene coding for PAFR was associated with increased risk of invasive pneumococcal disease in humans, although these results need to be validated as no correction for multiple testing was performed (72). In conclusion, our findings regarding the effect of adenosine on PAFR expression and bacterial binding on lung epithelial cells may have future implications for using clinically

available adenosine-based therapies (15) to boost host resistance to *S. pneumoniae* and other serious lung infections.

## **Materials and Methods**

### **Ethics statement**

This work was performed in accordance with the recommendations in the Guide for the Care and Use of Laboratory Animals published by the National Institutes of Health. All procedures were reviewed and approved by the University at Buffalo Institutional Animal Care and Use Committee (IACUC) and are under protocol # MIC33018Y.

### **Mice**

Young (2 months) and Old (18-22 months) C57BL/6 mice were purchased from Jackson Laboratories (Bar Harbor, ME) and the National Institute on Aging colonies and housed in a specific-pathogen free facility at the University at Buffalo. Male mice were used in all experiments.

### **Bacteria**

Wild type *S. pneumoniae* TIGR4 strain (serotype 4), were grown at 37°C with 5% CO<sub>2</sub> in Todd-Hewitt broth (BD Biosciences) supplemented with 0.5% yeast extract and Oxyrase (Oxyrase) until mid-exponential phase. Aliquots were then frozen at -80°C in the growth media with 25% (v/v) glycerol. Before use, bacterial aliquots were thawed on ice, washed once and diluted in PBS to the

required concentrations. Bacterial titers were confirmed by plating on Tryptic Soy Agar plates supplemented with 5% sheep blood agar (blood agar plates- Northeast Laboratory Services). The  $\Delta cps$  deletion mutant was a kind gift from Andrew Camilli (73).

### ***PMN isolation***

PMNs were isolated from the peripheral blood of healthy donors as previously described (74). Volunteers were recruited in accordance with the University at Buffalo Human Investigation Review Board (IRB) and signed informed consent forms.

### ***Bacterial binding assay with H292 cells***

Human pulmonary mucopidermoid carcinoma-derived NCI-H292 (H292) cells were purchased from ATCC and grown at 37°C/ CO<sub>2</sub> in “H292” media consisting of RPMI 1640 medium (ATCC) with 2 mM L-glutamine, 10% FBS, and 100 U penicillin/streptomycin following a previously described (45). The day before the binding assay 2.5 x 10<sup>5</sup> H292 cells were seeded in tissue culture-treated flat bottom 96-well plates (Corning) and allowed to adhere overnight. The following day, cells were washed in PBS and antibiotic-free H292 media was added. The cells were then pretreated for 30 minutes with the indicated drugs or PBS as a vehicle control and then infected with *S. pneumoniae* at an MOI of 10-20. The plates were spun down and incubated for 1 hour at 37°C/ CO<sub>2</sub>. To determine the amount of bacteria that adhered, the cells were washed with PBS, lifted with

0.05% Trypsin/EDTA (Invitrogen). Serial dilutions were then plated on blood agar plates for determination of bacterial colony forming units (CFU). The percent of bacteria bound were determined with respect to a no cell control where bacteria were added to the wells and incubated for an hour under the same experimental conditions (+/-drugs) and then viable bacteria enumerated by plating on blood agar plates. The amount of bacteria bound to control treated cells was set as 100 % and relative changes in bacterial binding in treated cells was then calculated and is presented as % bound relative to vehicle treated controls on the graphs.

#### ***Adenosine pathway and PAFR drugs***

The effect of the extracellular adenosine pathway was tested using the following: Adenosine (Sigma) diluted in PBS and used at the concentrations indicated on the graphs. The pan adenosine receptor agonist 5'-(N-Ethylcarboxamido) adenosine (NECA) used at 1 $\mu$ M. This agonist targets all four receptor with reported  $K_i$  values of 6.2, 14, and 20 nM for human A3, A1 and A2A receptors respectively and EC50 of 2.4  $\mu$ M for human A2B. The pan adenosine receptor inhibitor (ADRI) CGS-15943 used at 1 $\mu$ M. This inhibitor targets all four adenosine receptors, with  $K_i$  values of 3.5, 4.2, 16 and 51 nM for human A1, A2A, A2B and A3 receptors respectively. The A1 agonist 2-Chloro-N6-cyclopentyladenosine used at 10, 1, 0.1 nM, A2A agonist CGS21680 used at 270, 27, 2.7nM and A2B agonist BAY 60-6583 used at 200, 20, 2nM. These concentrations correspond to the approximate 10x $K_i$ ,  $K_i$  or 0.1 $K_i$  for each receptor. Adenosine receptor drugs were purchased from Tocris or Sigma Aldrich, dissolved in DMSO and dilutions

performed in PBS. The potent PAFR antagonist Apafant was also purchased from Tocris and used at 40nM corresponding to 2xKi.

### **Mouse infections**

The effect A1 receptor on lung infection was determined using the competitive inhibitor of A1 receptor, 8-Cyclopentyl-1,3-dipropylxanthine (DPCPX) or A1 agonist 2-Chloro-N6-cyclopentyladenosine. All chemicals were purchased from Sigma Aldrich, dissolved in DMSO and filter sterilized by passing through a 0.22µm filter. The mice were then given intraperitoneal (i.p.) injections of 1mg/kg of the A1 inhibitor or 0.1mg/Kg of the A1 agonist or vehicle control at days -1 and 0 (immediately before challenge) relative to infection. Control mice were mock-treated with the vehicle control. Mice were challenged intra-tracheally with  $2 \times 10^4$  *S. pneumoniae* TIGR4 as previously described (13). Six hours post-infection, mice were euthanized and lung and blood samples were harvested and plated on blood agar plates for enumeration of bacterial loads. Following the infection, mice were monitored daily and scored blindly for signs of sickness including weight loss, activity, posture and breathing. Based on these criteria, the mice were given a clinical score of healthy [0] to severely sick [21] as previously described (75).

### **Flow cytometry**

For examining adenosine receptor expression in the lungs, mice were perfused with 10ml PBS, the lungs harvested and minced into small pieces. The lungs



were then digested for 1 hour with RPMI 1640 supplemented with 10% FBS, 1 mg/ml Type II collagenase (Worthington), and 50 U/ml Deoxyribonuclease I (Worthington) at 37°C/ 5% CO<sub>2</sub>. Single-cell suspensions were obtained by mashing the digested lungs, and the red blood cells were removed by treatment with a hypotonic lysis buffer (Lonza). For examining expression of host proteins on H292 cells, the cells were infected with *S. pneumoniae* at an MOI of 2 as described in the binding assay. The cells were resuspended in FACS buffer (HBSS/ 1% FBS) then treated with Fc block (anti-mouse clone 2.4G2 and anti-human clone 3G8) purchased from BD and stained with specific antibodies. The following conjugated anti-human antibodies were used: PAFR (040582; Cederlane), ICAM (clone HA58; Biolegend), CD73 (clone TY/11.8; eBioscience), CD39 (clone24DMS-1; eBioscience) and PIGR (PA535340; Invitrogen). For staining for adenosine receptor antibodies, the cells were permeabilized using the BD Cytofix/Cytoperm kit. The following unconjugated primary rabbit polyclonal anti-adenosine receptor antibodies were purchased from abcam and used: anti-mouse and human A2a (ab3461), A2b (ab222901) and A3 (ab203298) as well as anti-mouse A1 (ab82477). Rabbit polyclonal IgG (ab37415) purchased from abcam and used as an isotype control. For anti-human A1 a primary rabbit monoclonal antibody was used (clone ERP6 179, ab124780). Secondary PE-conjugated anti-Rabbit IgG was used (12473981; Invitrogen). Fluorescence intensities were measured on a BD FACS Fortessa and data were analyzed using FlowJo.

## **RNA extraction and qPCR**

RNA was extracted from  $2 \times 10^5$  H292 using the RNeasy Mini Kit (Qiagen) as per manufacturer's protocol. TURBO DNA-free kit (Invitrogen) was used to digest DNA from the RNA samples prior conversion into cDNA. For each sample, 500ng of RNA was converted into cDNA using SuperScript VILO™ cDNA synthesis kit (Life Technologies) according to the manufacturer's protocol. RT-PCR was performed using CFX96 Touch™ Real-Time PCR Detection System from Bio-Rad and CT (cycle thresh-hold) values were determined using the following TaqMan probes from Life Technologies (Thermo Fischer Scientific): GAPDH (Hs99999905\_m1), A1 (Hs00181231\_m1), A2A (Hs00169123\_m1), A3 (Hs00252933\_m1), and A2B (Hs00386497\_m1). All samples were run in duplicates. Data were analyzed by the comparative threshold cycle ( $2^{-\Delta CT}$ ) method, normalizing the CT values obtained for target gene expression to those for GAPDH of the same sample. For comparison of adenosine receptor levels upon infection, relative quantity of transcripts (RQ) values were calculated by the  $\Delta\Delta CT$  method by using the formula  $RQ = 2^{-\Delta\Delta CT}$  (76). The  $\Delta\Delta CT$  values were obtained by subtracting  $\Delta CT$  value of the infected from that of the uninfected control.

## **Western blotting**

H292 cells were solubilized in radioimmunoprecipitation assay (RIPA) buffer (1% Triton X-100, 0.25% sodium deoxycholate, 0.05% SDS, 50 mM Tris-HCl [pH 7.5], 2 mM EDTA, 150 mM NaCl, 1 mM phenylmethylsulfonyl fluoride, 1 mM sodium

orthovanadate, 10 mg/liter each of aprotinin and leupeptin). Lysates were centrifuged and protein concentrations of the supernatants were quantified using bicinchoninic acid kit (Pierce). Equal protein quantities of each sample were migrated on Mini-PROTEAN TGX Stain-Free Precast Gels (BioRad) and transferred to polyvinylidene difluoride (PVDF) membranes. Incubations with primary antibodies at 1:1000 dilutions were done overnight at 4°C. Incubation with secondary antibodies (1: 5000 dilutions) coupled to horseradish peroxidase was done for 1 hour at room temperature. ChemiDoc XRS+ system (BioRad) was used for detection of all Western blots using Clarity Western ECL Substrate (BioRad). Blots were stripped in stripping buffer containing glycine, Triton-X 100 and SDS, and probed for GAPDH, which served as a loading control. Primary antibodies against A1 (ab124780), A2A (ab3461), A2B (ab222901) and A3 (ab203298) were all obtained from Abcam. Primary antibodies against GAPDH (MA5-15738) and horseradish peroxidase-conjugated secondary antibodies (31460 and 31430) were purchased from Invitrogen. Images were quantified using ImageJ (version 1.51e) software. Integrated pixel densities in bands corresponding to proteins of interest were measured, and the background was subtracted. Integrated pixel densities for GAPDH as loading controls were also determined and corrected for the background. Background-corrected integrated pixel densities of the protein of interest were normalized to those of the loading control.

## **Statistics**

All statistical analysis was performed using Prism7 (Graph Pad). CFU data were log-transformed to normalize distribution. For all graphs, the mean values +/- SD are presented. Significant differences were determined by 1-sample t-test or Student's t-test as indicated. Survival analysis was performed using the log-rank (Mantel-Cox) test. *p* values less than 0.05 were considered significant (as indicated by asterisks).

## Acknowledgments

We would like to acknowledge Andrew Camilli for bacterial strains as well as Anthony Campagnari and Ira Blader for their feedback on the manuscript.

## Legends

**Fig 1. Extracellular adenosine reduces binding of *S. pneumoniae* to pulmonary epithelial cells.** (A) H292 cells were treated with adenosine (ADE, 100μM) or vehicle control (VC) for 30 minutes and then infected with *S. pneumoniae* TIGR4 for 1 hour. The cells were then washed and the amount of bound bacteria were enumerated by plating on blood agar plates. (B) RNA was isolated from uninfected H292 cells and the expression of the indicated enzyme mRNA was measured by RT-qPCR and normalized to GAPDH. (C) Expression of CD73 (left panel) on H292 cells and CD39 on H292 cells and PMNs (right panel) was assessed by flow cytometry. Histograms shown are representative data from one of three separate experiments. (D) H292 cells were treated with either ADE, ATP, AMP (100μM) or vehicle control (VC) for 30 minutes and then

infected with *S. pneumoniae* TIGR4 for 1 hour. The number of bound bacteria was enumerated by plating on blood agar plates. The percent of bacterial binding was then calculated relative to vehicle control treatment that was set to a 100. (A and D) Data shown are pooled from four separate experiments (n=4 biological replicates) where each condition was tested in triplicate (n=3 technical replicates) per experiment. Asterisks indicate significance calculated by Student's t-test.

**Fig 2. Signaling via extracellular adenosine receptors is required for reduction of *S. pneumoniae* binding to pulmonary epithelial cells.** H292 cells were treated with either 100μM ADE, 100μM ADE in the presence of 1μM the pan adenosine receptors inhibitor (ADRI) CGS 15943, 1μM the pan adenosine receptors agonist 5'-N-Ethylcarboxamidoadenosine (NECA) or vehicle control (VC) for 30 minutes and then infected with *S. pneumoniae* TIGR4 for 1 hour. The number of bound bacteria was enumerated by plating on blood agar plates and the percent bacterial binding calculated relative to vehicle control. Data shown are pooled from three separate experiments where each condition was tested in triplicate. Asterisks indicate significance calculated by Student's t-test.

**Fig 3. Expression of adenosine receptors on H292 cells.** (A) RNA was isolated from uninfected H292 cells and the expression of the indicated adenosine receptor mRNA was measured by RT-qPCR and normalized to

GAPDH. (B) RNA was isolated from H292 cells mock treated (uninfected) or challenged with *S. pneumoniae* TIGR4 MOI of 2 for 1 hour and the relative change in expression of the indicated adenosine receptor mRNA upon infection was calculated by the  $\Delta\Delta$ CT method. Data shown are pooled from three separate experiments. H292 cells were infected with *S. pneumoniae* TIGR4 MOI of 2 for 1 hour or mock treated with PBS (uninfected). (C) Expression of adenosine receptors was assessed by flow cytometry. The percentage of cells expressing the receptors was then measured. Data shown are pooled from three separate experiments. (D) Expression of adenosine receptors was assessed by Western Blotting. One representative blot for each receptor is shown. (E) Western Blot band intensities were analyzed using ImageJ and expression of infected sample relative to uninfected controls is shown. Data presented are pooled from two experiments. (B and E) Adenosine receptor mRNA or protein levels upon infection were not significantly different from 1 by one-sample t-test.

**Fig 4. Signaling via A1 receptor is required for inhibiting binding of *S.***

***pneumoniae in vitro and in vivo.*** (A) H292 cells were treated for 30 minutes with either the indicated concentrations of ADE, vehicle control (VC) or at the following concentrations of A1 agonist 2-Chloro-N6-cyclopentyladenosine (10, 1, 0.1 nM), A2A agonist CGS21680 (270, 27, 2.7nM) or A2B agonist BAY 60-6583 (200, 20, 2nM) corresponding to the approximate 10xKi, Ki or 0.1Ki for each receptor as indicated on the graph. The cells were then infected with *S. pneumoniae* TIGR4 for 1 hour. The number of bound bacteria was determined by

plating on blood agar plates and the percent bacterial binding calculated relative to vehicle control treatment. Data shown are pooled from three separate experiments where each condition was tested in triplicate. Asterisks indicate significant differences as compared to VC calculated by Student's t-test.

**Fig 5. Signaling via A1 receptor reduces expression of PAFR on H292 cells.**

H292 cells were treated for 30 minutes with vehicle control (VC), ADE (100µM), or A1 agonist 2-Chloro-N6-cyclopentyladenosine (10nM) as indicated. The cells were then infected with *S. pneumoniae* TIGR4 MOI of 2 or mock treated (uninfected) for 1 hour. (A-C) Expression of ICAM-1, PIGR and PAFR was assessed by flow cytometry. The Mean florescent intensities (MFI) as well as the percentage of cells expressing the indicated ligands were then measured. (A-C) Data shown are pooled from three separate experiments where each condition was tested in triplicate. Asterisks indicate significant differences calculated by Student's t-test.

**Fig 6. A1 receptor signaling does not further decrease bacterial binding**

**when PAFR is inhibited.** H292 cells were treated for 30 minutes with the indicated vehicle control (VC), ADE (100µM), A1 agonist 2-Chloro-N6-cyclopentyladenosine (10nM) or PAFR inhibitor (40nM). The cells were then infected with *S. pneumoniae* TIGR4 MOI of 20 for 1 hour. The number of bound bacteria was enumerated by plating on blood agar plates and the percent bacterial binding calculated relative to vehicle control. Data shown are pooled

from four separate experiments where each condition was tested in triplicate.

Asterisks indicate significant differences vs. vehicle control treated cells

calculated by Student's t-test.

# **Fig 7. Pulmonary expression of adenosine receptors in mice are not altered**

**by aging or *S. pneumoniae* infection.** Young and old C57BL/6J mice were

infected with *S. pneumoniae* intra-tracheally. The lungs were harvested six hours

post infection and digested into a single cell suspension and the expression of

adenosine receptors analyzed by flow cytometry. (A) Histograms shown are

representative data from young mice and (B) bar graphs are quantification of the

Mean Florescent Intensities (MFI) of the indicated adenosine receptor from

young and old mice and are pooled from six separate experiments with n=9-12

mice per group.

# **Fig 8. Signaling via A1 receptor is important for the control of pulmonary**

**pneumococcal burden *in vivo*.** Young mice mock-treated or treated with

DPCPX, an A1 receptor inhibitor and old mice mock-treated or treated with 2-

Chloro-N6-cyclopentyladenosine, an A1 receptor agonist were inoculated intra-

tracheally with  $\sim 1-2 \times 10^4$  CFU of *S. pneumoniae* TIGR4. (A) Bacterial burdens in

the lungs were determined 6 hours post-infection. Data shown are pooled from

n=9 young and n=4 old mice per group. (B-E) To follow the infection over time,

mice were challenged with  $\sim 1-2 \times 10^4$  CFU of *S. pneumoniae* TIGR4. Bacterial

burdens in the blood (B) and clinical scores (C) were determined 24 hours post-



infection. Asterisks indicate significant differences calculated by Student's t-test. Survival of control and A1 inhibited young mice (D) as well as control and A1 agonist-treated old mice (E) and was assessed at the indicated time points following challenge. Fractions denote survivors at 7 days after challenge over the total number of mice. Asterisks indicate a statistical significance by the log-Rank (Mantel-Cox) test. Data were pooled from two independent experiments.

## References

1. van der Poll T, Opal SM. Pathogenesis, treatment, and prevention of pneumococcal pneumonia. *Lancet*. 2009;374(9700):1543-56.
2. Kadioglu A, Weiser JN, Paton JC, Andrew PW. The role of *Streptococcus pneumoniae* virulence factors in host respiratory colonization and disease. *Nature reviews Microbiology*. 2008;6(4):288-301.
3. Chong CP, Street PR. Pneumonia in the elderly: a review of the epidemiology, pathogenesis, microbiology, and clinical features. *South Med J*. 2008;101(11):1141-5; quiz 32, 79.
4. Boe DM, Boule LA, Kovacs EJ. Innate immune responses in the ageing lung. *Clinical and experimental immunology*. 2017;187(1):16-25.
5. Centers for Disease Control and Prevention. 2016. Active Bacterial Core Surveillance Report EIPN, *Streptococcus pneumoniae*, 2016. Available via the internet: <http://www.cdc.gov/abcs/reports-findings/survreports/spneu16.pdf>. 2016.

- 757 6. Briles EB, Tomasz A. Pneumococcal Forssman antigen. A choline-  
758 containing lipoteichoic acid. The Journal of biological chemistry.  
759 1973;248(18):6394-7.
- 760 7. Cundell DR, Gerard NP, Gerard C, Idanpaan-Heikkila I, Tuomanen EI.  
761 Streptococcus pneumoniae anchor to activated human cells by the receptor for  
762 platelet-activating factor. Nature. 1995;377(6548):435-8.
- 763 8. Duitman J, Schouten M, Groot AP, Borensztajn KS, Daalhuisen JB,  
764 Florquin S, et al. CCAAT/enhancer-binding protein delta facilitates bacterial  
765 dissemination during pneumococcal pneumonia in a platelet-activating factor  
766 receptor-dependent manner. Proc Natl Acad Sci U S A. 2012;109(23):9113-8.
- 767 9. Shivshankar P, Boyd AR, Le Saux CJ, Yeh IT, Orihuela CJ. Cellular  
768 senescence increases expression of bacterial ligands in the lungs and is  
769 positively correlated with increased susceptibility to pneumococcal pneumonia.  
770 Aging Cell.10(5):798-806.
- 771 10. Ishizuka S, Yamaya M, Suzuki T, Nakayama K, Kamanaka M, Ida S, et al.  
772 Acid exposure stimulates the adherence of Streptococcus pneumoniae to  
773 cultured human airway epithelial cells: effects on platelet-activating factor  
774 receptor expression. American journal of respiratory cell and molecular biology.  
775 2001;24(4):459-68.
- 776 11. Shukla SD, Fairbairn RL, Gell DA, Latham RD, Sohal SS, Walters EH, et  
777 al. An antagonist of the platelet-activating factor receptor inhibits adherence of  
778 both nontypeable Haemophilus influenzae and Streptococcus pneumoniae to

779 cultured human bronchial epithelial cells exposed to cigarette smoke.

780 International journal of chronic obstructive pulmonary disease. 2016;11:1647-55.

781 12. Rijneveld AW, Weijer S, Florquin S, Speelman P, Shimizu T, Ishii S, et al.

782 Improved host defense against pneumococcal pneumonia in platelet-activating

783 factor receptor-deficient mice. J Infect Dis. 2004;189(4):711-6.

784 13. Bou Ghanem EN, Clark S, Roggensack SE, McIver SR, Alcaide P,

785 Haydon PG, et al. Extracellular Adenosine Protects against Streptococcus

786 pneumoniae Lung Infection by Regulating Pulmonary Neutrophil Recruitment.

787 PLoS pathogens. 2015;11(8):e1005126.

788 14. Bajgar A, Dolezal T. Extracellular adenosine modulates host-pathogen

789 interactions through regulation of systemic metabolism during immune response

790 in Drosophila. PLoS pathogens. 2018;14(4):e1007022.

791 15. Hasko G, Linden J, Cronstein B, Pacher P. Adenosine receptors:

792 therapeutic aspects for inflammatory and immune diseases. Nature reviews Drug

793 discovery. 2008;7(9):759-70.

794 16. Burnstock G, Brouns I, Adriaensen D, Timmermans JP. Purinergic

795 signaling in the airways. Pharmacological reviews. 2012;64(4):834-68.

796 17. Hoegl S, Brodsky KS, Blackburn MR, Karmouty-Quintana H, Zwissler B,

797 Eltzschig HK. Alveolar Epithelial A2B Adenosine Receptors in Pulmonary

798 Protection during Acute Lung Injury. J Immunol. 2015;195(4):1815-24.

799 18. Allen-Gipson DS, Blackburn MR, Schneider DJ, Zhang H, Bluitt DL, Jarrell

800 JC, et al. Adenosine activation of A(2B) receptor(s) is essential for stimulated

801 epithelial ciliary motility and clearance. American journal of physiology Lung  
802 cellular and molecular physiology. 2011;301(2):L171-80.

803 19. Allen-Gipson DS, Wong J, Spurzem JR, Sisson JH, Wyatt TA. Adenosine  
804 A2A receptors promote adenosine-stimulated wound healing in bronchial  
805 epithelial cells. American journal of physiology Lung cellular and molecular  
806 physiology. 2006;290(5):L849-55.

807 20. Factor P, Mutlu GM, Chen L, Mohameed J, Akhmedov AT, Meng FJ, et al.  
808 Adenosine regulation of alveolar fluid clearance. Proc Natl Acad Sci U S A.  
809 2007;104(10):4083-8.

810 21. Gobran LI, Rooney SA. Adenosine A1 receptor-mediated inhibition of  
811 surfactant secretion in rat type II pneumocytes. The American journal of  
812 physiology. 1990;258(2 Pt 1):L45-51.

813 22. Roman J, Rivera HN, Roser-Page S, Sitaraman SV, Ritzenthaler JD.  
814 Adenosine induces fibronectin expression in lung epithelial cells: implications for  
815 airway remodeling. American journal of physiology Lung cellular and molecular  
816 physiology. 2006;290(2):L317-25.

817 23. McNamara N, Gallup M, Khong A, Sucher A, Maltseva I, Fahy J, et al.  
818 Adenosine up-regulation of the mucin gene, MUC2, in asthma. FASEB journal :  
819 official publication of the Federation of American Societies for Experimental  
820 Biology. 2004;18(14):1770-2.

821 24. Zhong H, Wu Y, Belardinelli L, Zeng D. A2B adenosine receptors induce  
822 IL-19 from bronchial epithelial cells, resulting in TNF-alpha increase. American  
823 journal of respiratory cell and molecular biology. 2006;35(5):587-92.

- 824 25. Theatre E, Frederix K, Guilmain W, Delierneux C, Lecut C, Bettendorff L,  
825 et al. Overexpression of CD39 in mouse airways promotes bacteria-induced  
826 inflammation. *J Immunol.* 2012;189(4):1966-74.
- 827 26. Aeffer F, Woods PS, Davis IC. Activation of A1-adenosine receptors  
828 promotes leukocyte recruitment to the lung and attenuates acute lung injury in  
829 mice infected with influenza A/WSN/33 (H1N1) virus. *Journal of virology.*  
830 2014;88(17):10214-27.
- 831 27. Aeffer F, Woods PS, Davis IC. Ecto-5'-nucleotidase CD73 modulates the  
832 innate immune response to influenza infection but is not required for  
833 development of influenza-induced acute lung injury. *American journal of*  
834 *physiology Lung cellular and molecular physiology.* 2015;309(11):L1313-22.
- 835 28. Barletta KE, Cagnina RE, Burdick MD, Linden J, Mehrad B. Adenosine  
836 A(2B) receptor deficiency promotes host defenses against gram-negative  
837 bacterial pneumonia. *American journal of respiratory and critical care medicine.*  
838 2012;186(10):1044-50.
- 839 29. Barletta KE, Ley K, Mehrad B. Regulation of neutrophil function by  
840 adenosine. *Arteriosclerosis, thrombosis, and vascular biology.* 2012;32(4):856-  
841 64.
- 842 30. Driver AG, Kukoly CA, Ali S, Mustafa SJ. Adenosine in bronchoalveolar  
843 lavage fluid in asthma. *The American review of respiratory disease.*  
844 1993;148(1):91-7.

- 845 31. Crane JK, Shulgina I. Feedback effects of host-derived adenosine on  
846 enteropathogenic *Escherichia coli*. *FEMS immunology and medical microbiology*.  
847 2009;57(3):214-28.
- 848 32. Kao DJ, Saeedi BJ, Kitzenberg D, Burney KM, Dobrinskikh E, Battista KD,  
849 et al. Intestinal Epithelial Ecto-5'-Nucleotidase (CD73) Regulates Intestinal  
850 Colonization and Infection by Nontyphoidal *Salmonella*. *Infect Immun*.  
851 2017;85(10).
- 852 33. Cundell DR, Weiser JN, Shen J, Young A, Tuomanen EI. Relationship  
853 between colonial morphology and adherence of *Streptococcus pneumoniae*.  
854 *Infect Immun*. 1995;63(3):757-61.
- 855 34. Sanchez CJ, Hinojosa CA, Shivshankar P, Hyams C, Camberlein E,  
856 Brown JS, et al. Changes in capsular serotype alter the surface exposure of  
857 pneumococcal adhesins and impact virulence. *PloS one*. 2011;6(10):e26587.
- 858 35. Trzcinski K, Li Y, Weinberger DM, Thompson CM, Cordy D, Bessolo A, et  
859 al. Effect of Serotype on Pneumococcal Competition in a Mouse Colonization  
860 Model. *mBio*. 2015;6(5):e00902-15.
- 861 36. Hammerschmidt S, Wolff S, Hocke A, Rosseau S, Muller E, Rohde M.  
862 Illustration of pneumococcal polysaccharide capsule during adherence and  
863 invasion of epithelial cells. *Infect Immun*. 2005;73(8):4653-67.
- 864 37. Sanchez CJ, Kumar N, Lizcano A, Shivshankar P, Dunning Hotopp JC,  
865 Jorgensen JH, et al. *Streptococcus pneumoniae* in biofilms are unable to cause  
866 invasive disease due to altered virulence determinant production. *PloS one*.  
867 2011;6(12):e28738.

- 868 38. Giacomelli C, Daniele S, Romei C, Tavanti L, Neri T, Piano I, et al. The  
869 A2B Adenosine Receptor Modulates the Epithelial- Mesenchymal Transition  
870 through the Balance of cAMP/PKA and MAPK/ERK Pathway Activation in Human  
871 Epithelial Lung Cells. *Frontiers in pharmacology*. 2018;9:54.
- 872 39. Zhang JR, Mostov KE, Lamm ME, Nanno M, Shimida S, Ohwaki M, et al.  
873 The polymeric immunoglobulin receptor translocates pneumococci across human  
874 nasopharyngeal epithelial cells. *Cell*. 2000;102(6):827-37.
- 875 40. Murdoch C, Read RC, Zhang Q, Finn A. Choline-binding protein A of  
876 *Streptococcus pneumoniae* elicits chemokine production and expression of  
877 intercellular adhesion molecule 1 (CD54) by human alveolar epithelial cells. *J*  
878 *Infect Dis*. 2002;186(9):1253-60.
- 879 41. Bou Ghanem EN, Clark S, Du X, Wu D, Camilli A, Leong JM, et al. The  
880 alpha-tocopherol form of vitamin E reverses age-associated susceptibility to  
881 *streptococcus pneumoniae* lung infection by modulating pulmonary neutrophil  
882 recruitment. *J Immunol*. 2015;194(3):1090-9.
- 883 42. Walia B, Castaneda FE, Wang L, Kolachala VL, Bajaj R, Roman J, et al.  
884 Polarized fibronectin secretion induced by adenosine regulates bacterial-  
885 epithelial interaction in human intestinal epithelial cells. *The Biochemical journal*.  
886 2004;382(Pt 2):589-96.
- 887 43. Spooner R, DeGuzman J, Lee KL, Yilmaz O. Danger signal adenosine via  
888 adenosine 2a receptor stimulates growth of *Porphyromonas gingivalis* in primary  
889 gingival epithelial cells. *Molecular oral microbiology*. 2014;29(2):67-78.

- 890 44. Pettengill MA, Lam VW, Ojcius DM. The danger signal adenosine induces  
891 persistence of chlamydial infection through stimulation of A2b receptors. *PloS*  
892 *one*. 2009;4(12):e8299.
- 893 45. Bhowmick R, Tin Maung NH, Hurley BP, Ghanem EB, Gronert K,  
894 McCormick BA, et al. Systemic disease during *Streptococcus pneumoniae* acute  
895 lung infection requires 12-lipoxygenase-dependent inflammation. *J Immunol*.  
896 2013;191(10):5115-23.
- 897 46. Pettengill MA, Marques-da-Silva C, Avila ML, d'Arc dos Santos Oliveira S,  
898 Lam VW, Ollawa I, et al. Reversible inhibition of *Chlamydia trachomatis* infection  
899 in epithelial cells due to stimulation of P2X(4) receptors. *Infect Immun*.  
900 2012;80(12):4232-8.
- 901 47. Eltzschig HK, Macmanus CF, Colgan SP. Neutrophils as sources of  
902 extracellular nucleotides: functional consequences at the vascular interface.  
903 *Trends in cardiovascular medicine*. 2008;18(3):103-7.
- 904 48. Ngamsri KC, Wagner R, Vollmer I, Stark S, Reutershan J. Adenosine  
905 receptor A1 regulates polymorphonuclear cell trafficking and microvascular  
906 permeability in lipopolysaccharide-induced lung injury. *J Immunol*.  
907 2010;185(7):4374-84.
- 908 49. Fernandez LG, Sharma AK, LaPar DJ, Kron IL, Laubach VE. Adenosine  
909 A1 receptor activation attenuates lung ischemia-reperfusion injury. *The Journal of*  
910 *thoracic and cardiovascular surgery*. 2013;145(6):1654-9.



911 50. Sun CX, Young HW, Molina JG, Volmer JB, Schnermann J, Blackburn  
912 MR. A protective role for the A1 adenosine receptor in adenosine-dependent  
913 pulmonary injury. *The Journal of clinical investigation*. 2005;115(1):35-43.

914 51. Iovino F, Brouwer MC, van de Beek D, Molema G, Bijlsma JJ. Signalling  
915 or binding: the role of the platelet-activating factor receptor in invasive  
916 pneumococcal disease. *Cellular microbiology*. 2013;15(6):870-81.

917 52. Mushtaq N, Ezzati M, Hall L, Dickson I, Kirwan M, Png KM, et al.  
918 Adhesion of *Streptococcus pneumoniae* to human airway epithelial cells exposed  
919 to urban particulate matter. *The Journal of allergy and clinical immunology*.  
920 2011;127(5):1236-42 e2.

921 53. Radin JN, Orihuela CJ, Murti G, Guglielmo C, Murray PJ, Tuomanen EI.  
922 beta-Arrestin 1 participates in platelet-activating factor receptor-mediated  
923 endocytosis of *Streptococcus pneumoniae*. *Infect Immun*. 2005;73(12):7827-35.

924 54. Fillon S, Soulis K, Rajasekaran S, Benedict-Hamilton H, Radin JN,  
925 Orihuela CJ, et al. Platelet-activating factor receptor and innate immunity: uptake  
926 of gram-positive bacterial cell wall into host cells and cell-specific  
927 pathophysiology. *J Immunol*. 2006;177(9):6182-91.

928 55. Chen JF, Chern Y. Impacts of methylxanthines and adenosine receptors  
929 on neurodegeneration: human and experimental studies. *Handbook of*  
930 *experimental pharmacology*. 2011(200):267-310.

931 56. Willems L, Ashton KJ, Headrick JP. Adenosine-mediated cardioprotection  
932 in the aging myocardium. *Cardiovascular research*. 2005;66(2):245-55.

- 933 57. Headrick JP. Impact of aging on adenosine levels, A1/A2 responses,  
934 arrhythmogenesis, and energy metabolism in rat heart. The American journal of  
935 physiology. 1996;270(3 Pt 2):H897-906.
- 936 58. Mackiewicz M, Nikonova EV, Zimmermann JE, Romer MA, Cater J,  
937 Galante RJ, et al. Age-related changes in adenosine metabolic enzymes in  
938 sleep/wake regulatory areas of the brain. Neurobiology of aging. 2006;27(2):351-  
939 60.
- 940 59. Crosti F, Ciboddo GF, Barbieri MC, Inversi F, Pavoni D, Quarenghi S, et  
941 al. Evidence for adenosine adenosinedeaminase lymphocyte system impairment  
942 in ageing. Bollettino dell'Istituto sieroterapico milanese. 1987;66(4):282-8.
- 943 60. Yeo EJ, Park SC. Age-dependent agonist-specific dysregulation of  
944 membrane-mediated signal transduction: emergence of the gate theory of aging.  
945 Mech Ageing Dev. 2002;123(12):1563-78.
- 946 61. Rolband GC, Furth ED, Staddon JM, Rogus EM, Goldberg AP. Effects of  
947 age and adenosine in the modulation of insulin action on rat adipocyte  
948 metabolism. Journal of gerontology. 1990;45(5):B174-8.
- 949 62. Reaven GM, Chang H, Hoffman BB. Impaired insulin-mediated inhibition  
950 of lipolysis and glucose transport with aging. Hormone and metabolic research =  
951 Hormon- und Stoffwechselforschung = Hormones et metabolisme.  
952 1989;21(4):168-71.
- 953 63. Headrick JP, Willems L, Ashton KJ, Holmgren K, Peart J, Matherne GP.  
954 Ischaemic tolerance in aged mouse myocardium: the role of adenosine and

955 effects of A1 adenosine receptor overexpression. The Journal of physiology.  
956 2003;549(Pt 3):823-33.

957 64. Hesdorffer CS, Malchinkhuu E, Biragyn A, Mabrouk OS, Kennedy RT,  
958 Madara K, et al. Distinctive immunoregulatory effects of adenosine on T cells of  
959 older humans. FASEB journal : official publication of the Federation of American  
960 Societies for Experimental Biology. 2012;26(3):1301-10.

961 65. Clark SE, Weiser JN. Microbial modulation of host immunity with the small  
962 molecule phosphorylcholine. Infect Immun. 2013;81(2):392-401.

963 66. Swords WE, Buscher BA, Ver Steeg li K, Preston A, Nichols WA, Weiser  
964 JN, et al. Non-typeable Haemophilus influenzae adhere to and invade human  
965 bronchial epithelial cells via an interaction of lipooligosaccharide with the PAF  
966 receptor. Molecular microbiology. 2000;37(1):13-27.

967 67. Weiser JN, Goldberg JB, Pan N, Wilson L, Virji M. The phosphorylcholine  
968 epitope undergoes phase variation on a 43-kilodalton protein in Pseudomonas  
969 aeruginosa and on pili of Neisseria meningitidis and Neisseria gonorrhoeae.  
970 Infect Immun. 1998;66(9):4263-7.

971 68. Serino L, Virji M. Genetic and functional analysis of the phosphorylcholine  
972 moiety of commensal Neisseria lipopolysaccharide. Molecular microbiology.  
973 2002;43(2):437-48.

974 69. Barbier M, Oliver A, Rao J, Hanna SL, Goldberg JB, Alberti S. Novel  
975 phosphorylcholine-containing protein of Pseudomonas aeruginosa chronic  
976 infection isolates interacts with airway epithelial cells. J Infect Dis.  
977 2008;197(3):465-73.

978 70. Smani Y, Docobo-Perez F, Lopez-Rojas R, Dominguez-Herrera J, Ibanez-  
979 Martinez J, Pachon J. Platelet-activating factor receptor initiates contact of  
980 *Acinetobacter baumannii* expressing phosphorylcholine with host cells. The  
981 Journal of biological chemistry. 2012;287(32):26901-10.

982 71. Hergott CB, Roche AM, Naidu NA, Mesaros C, Blair IA, Weiser JN.  
983 Bacterial exploitation of phosphorylcholine mimicry suppresses inflammation to  
984 promote airway infection. The Journal of clinical investigation.  
985 2015;125(10):3878-90.

986 72. Lingappa JR, Dumitrescu L, Zimmer SM, Lynfield R, McNicholl JM,  
987 Messonier NE, et al. Identifying host genetic risk factors in the context of public  
988 health surveillance for invasive pneumococcal disease. PloS one.  
989 2011;6(8):e23413.

990 73. Shainheit MG, Mule M, Camilli A. The core promoter of the capsule  
991 operon of *Streptococcus pneumoniae* is necessary for colonization and invasive  
992 disease. Infect Immun. 2014;82(2):694-705.

993 74. Bou Ghanem EN, Lee JN, Joma BH, Meydani SN, Leong JM, Panda A.  
994 The Alpha-Tocopherol Form of Vitamin E Boosts Elastase Activity of Human  
995 PMNs and Their Ability to Kill *Streptococcus pneumoniae*. Frontiers in cellular  
996 and infection microbiology. 2017;7:161.

997 75. Mook-Kanamori B, Geldhoff M, Troost D, van der Poll T, van de Beek D.  
998 Characterization of a pneumococcal meningitis mouse model. BMC infectious  
999 diseases. 2012;12:71.

76. Livak KJ, Schmittgen TD. Analysis of relative gene expression data using real-time quantitative PCR and the 2(-Delta Delta C(T)) Method. *Methods*. 2001;25(4):402-8.

## Supporting Information Legends

**Figure S1.** Effect of adenosine pathway drugs on bacterial viability. *S. pneumoniae* TIGR4 were treated with PBS control, adenosine (ADE, 100μM), A1 agonist 2-Chloro-N6-cyclopentyladenosine (10, 1, 0.1 nM), A2A agonist CGS21680 (270, 27, 2.7nM) or A2B agonist BAY 60-6583 (200, 20, 2nM) corresponding to the approximate 10xKi, Ki or 0.1Ki for each receptor for 1 hour. The number of viable bacteria was determined by plating on blood agar plates. Data shown are pooled from three separate experiments where each condition was tested in triplicate.

**Figure S2.** Adenosine does not alter expression of bacterial capsular polysaccharide. (A) *S. pneumoniae* TIGR4 were treated with adenosine (ADE, 100μM) or vehicle control (VC) for 30 minutes and expression of capsular polysaccharide measured by flow cytometry. Left panel, representative data from one of three separate experiments where each condition was tested in triplicate are shown. Right panel, representative histogram with the gating strategy using Δcps *S. pneumoniae* TIGR4 as a negative control is shown. (B) H292 cells were treated with adenosine (ADE, 100μM) or vehicle control (VC) for 30 minutes and then infected with WT or Δcps *S. pneumoniae* TIGR4 at an MOI of 20 for 1 hour.

1023 The number of bound bacteria was determined by plating on blood agar plates  
1024 and the percent bacterial binding calculated relative to binding of WT bacteria to  
1025 vehicle control treated cells. Data shown are pooled from three separate  
1026 experiments where each condition was tested in triplicate. Asterisks indicate  
1027 significant differences calculated by Student's t-test.  
1028

Figure 1

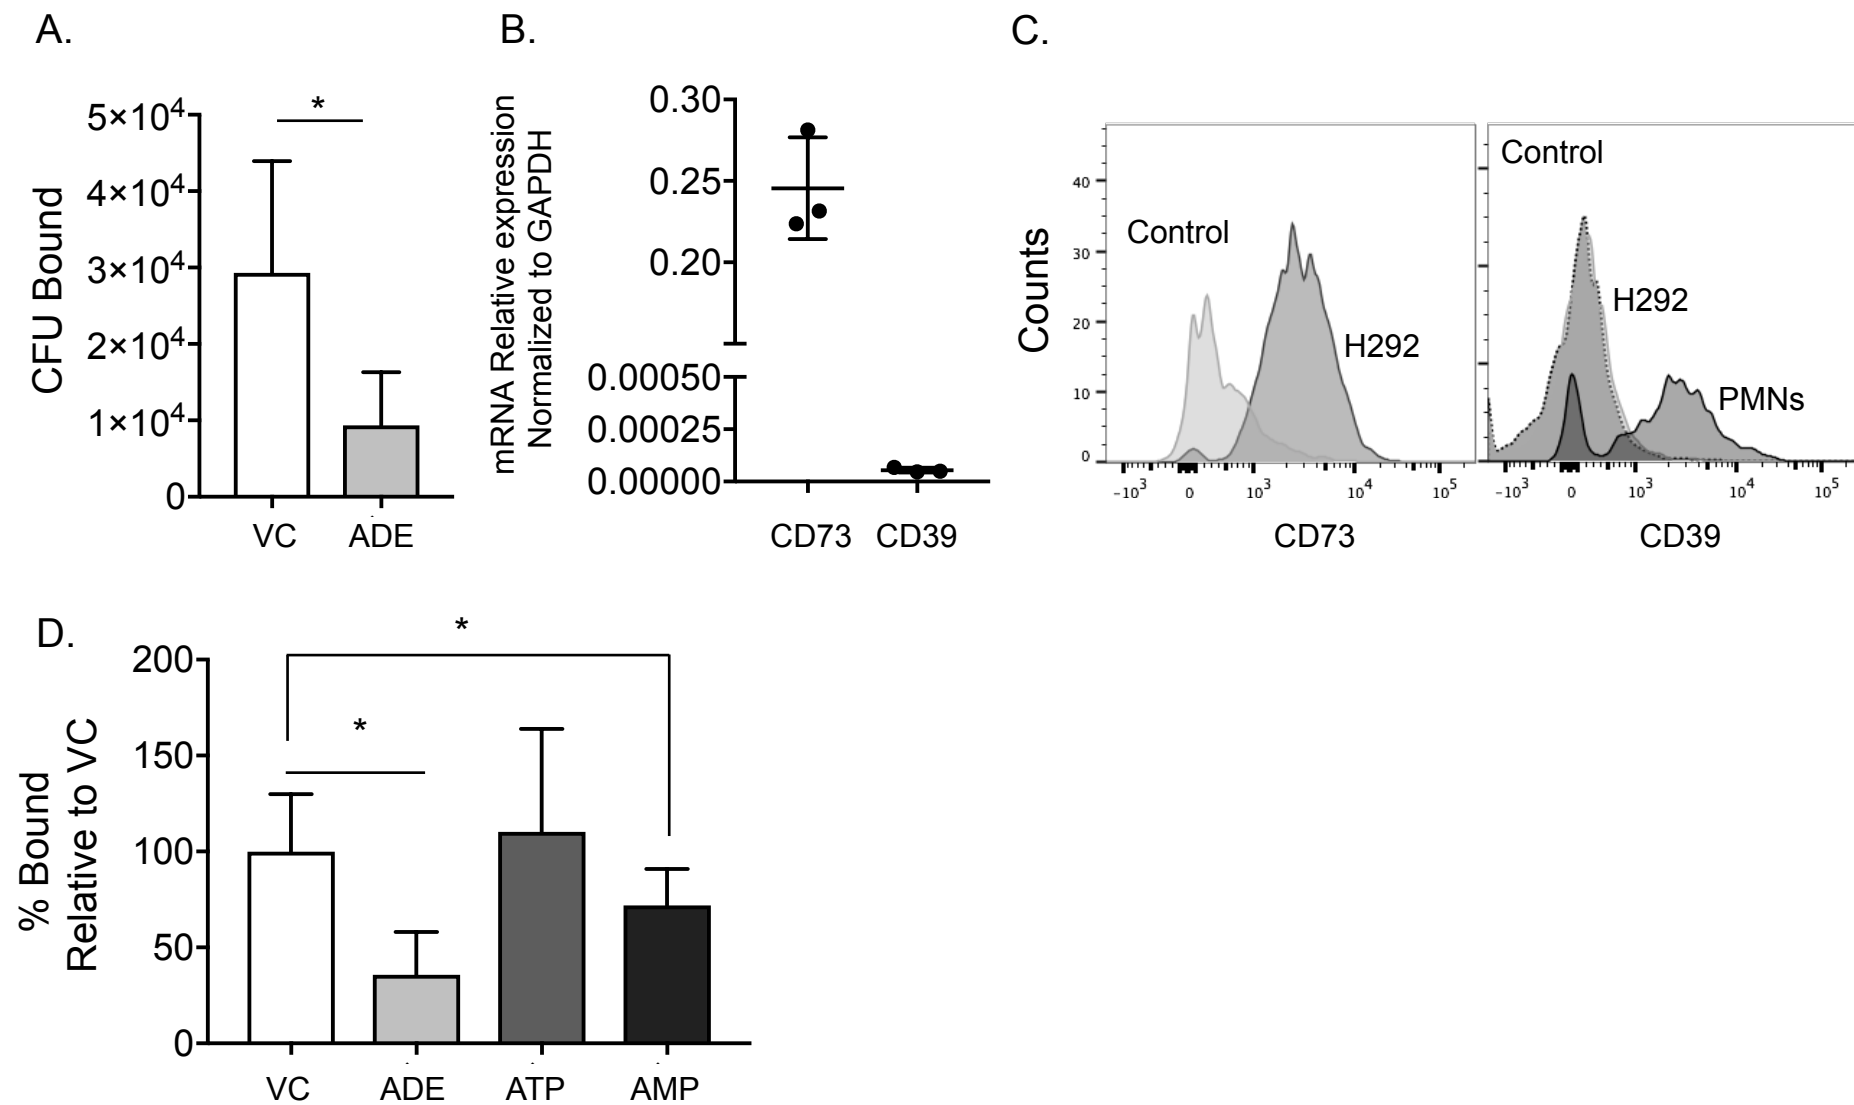

Figure 2

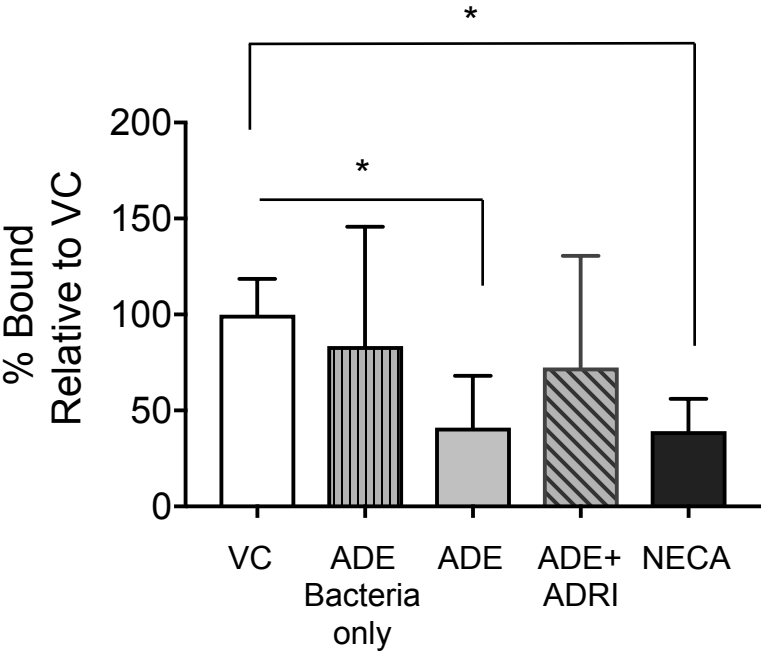



Figure 3

A.

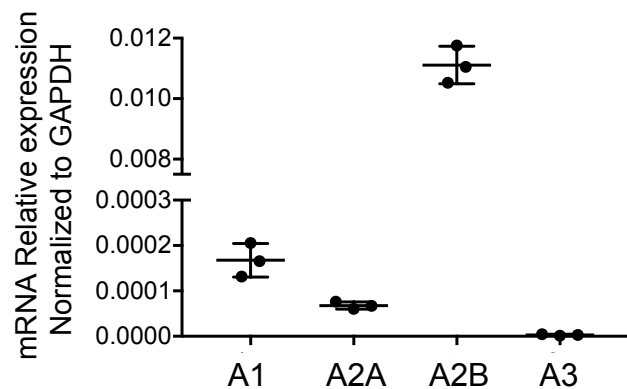

B.

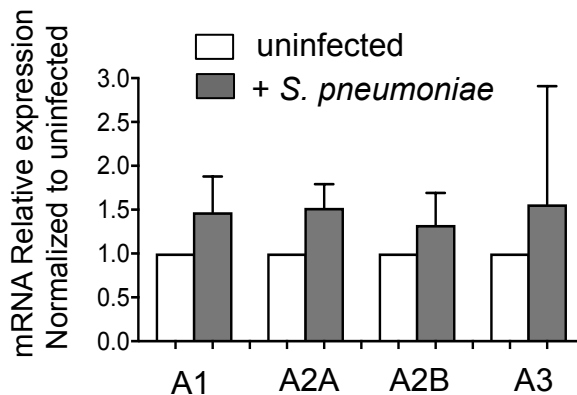

C.

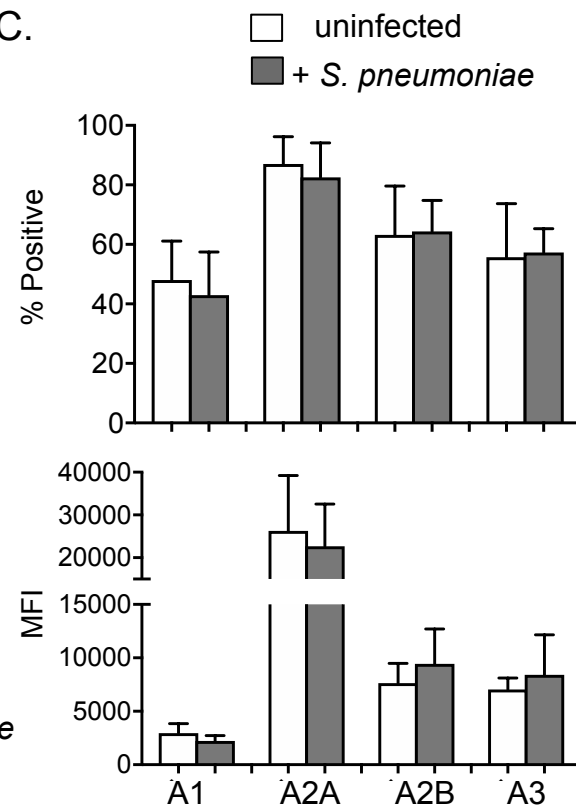

D.

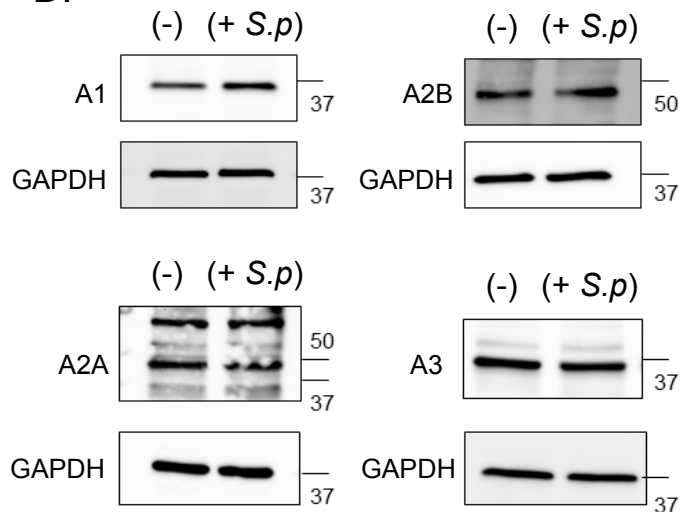

E.

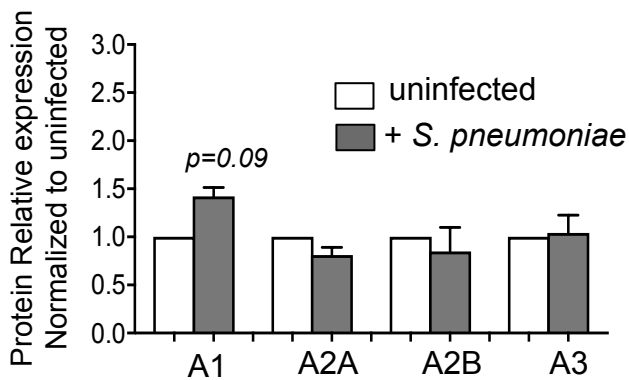

Figure 4

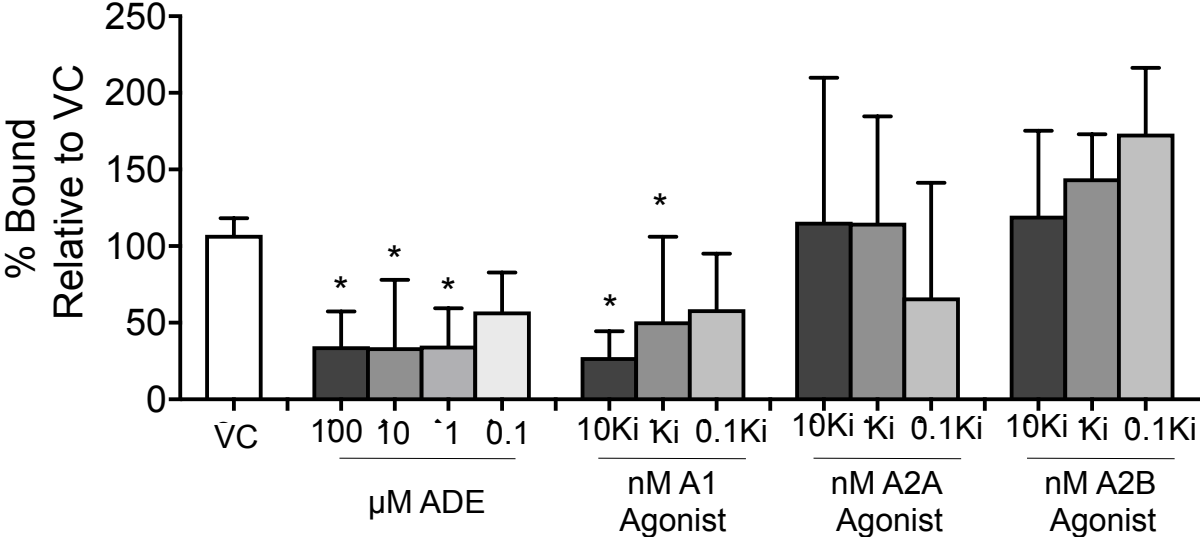

Figure 5

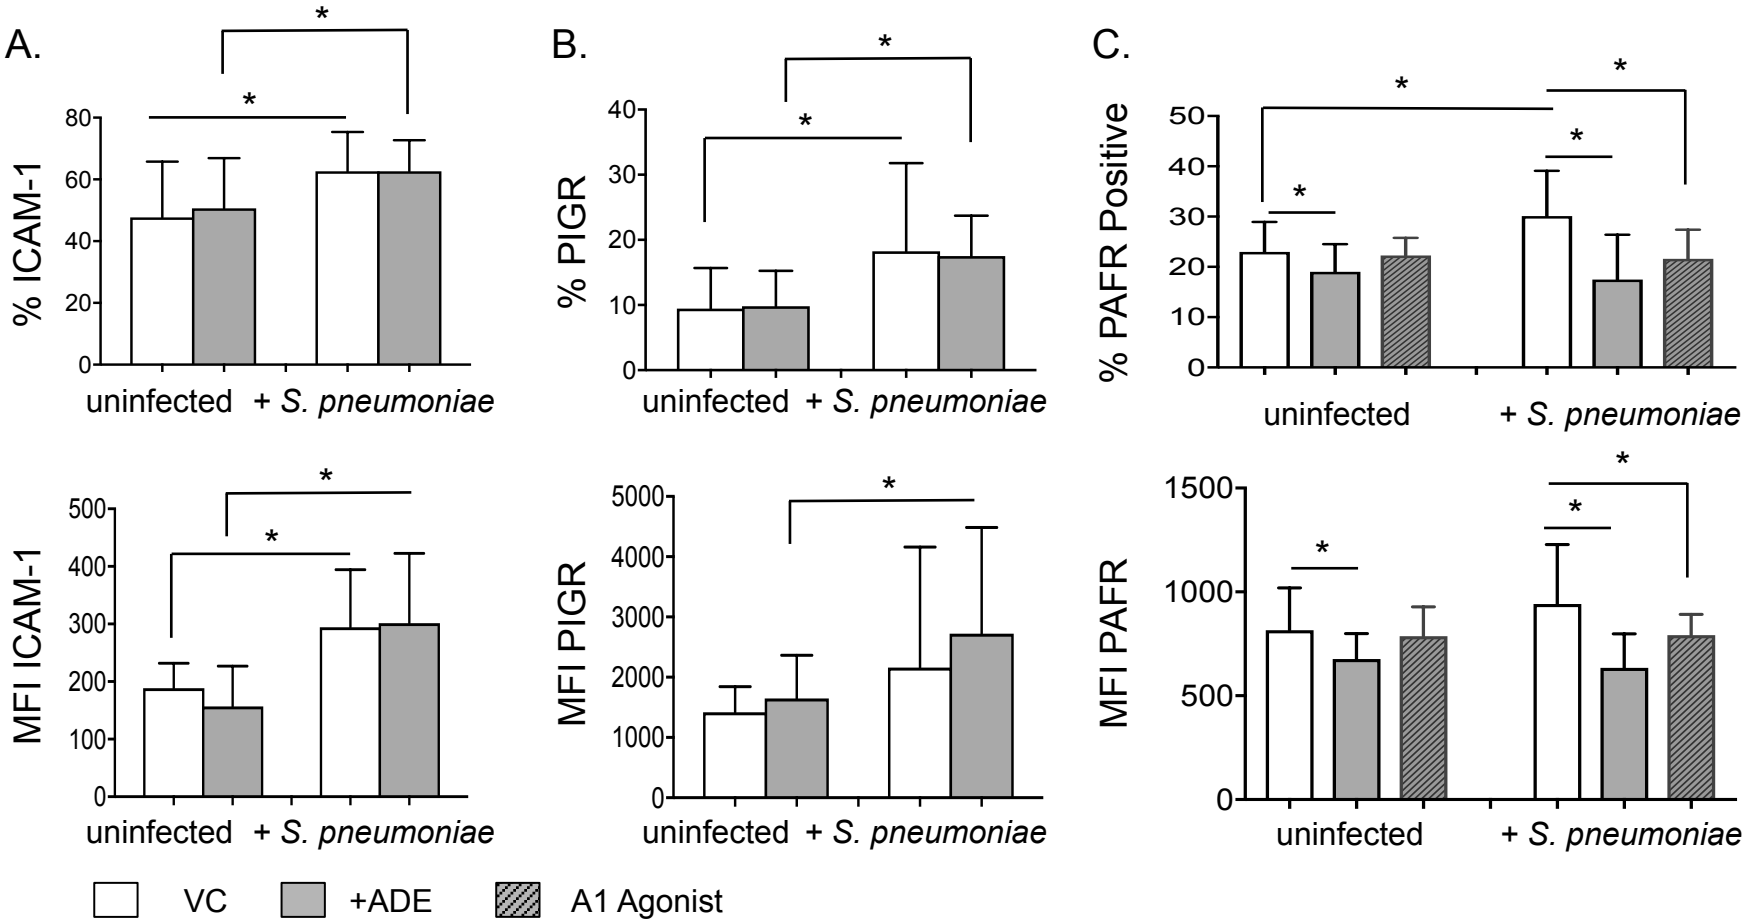

Figure 6

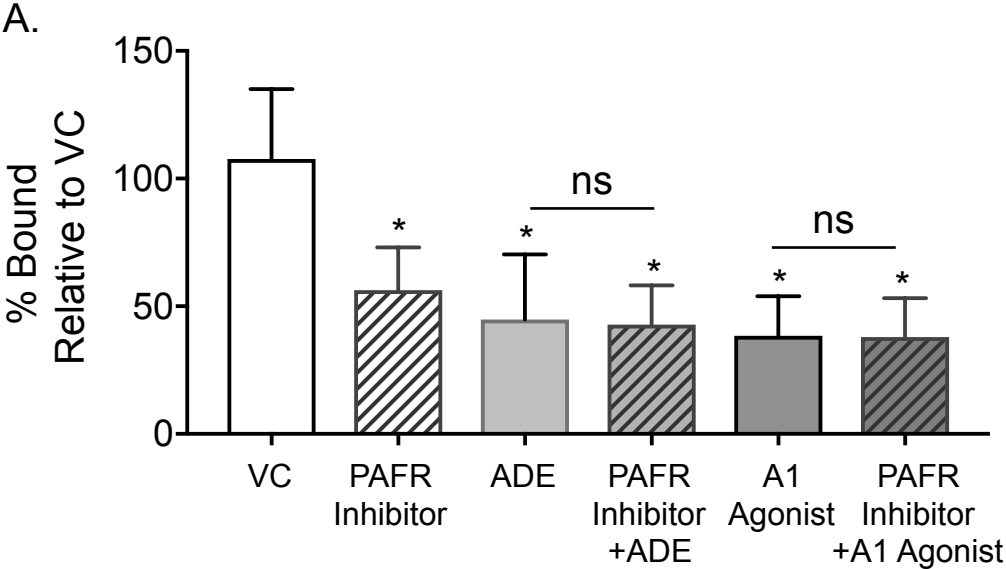

Figure 7

A.

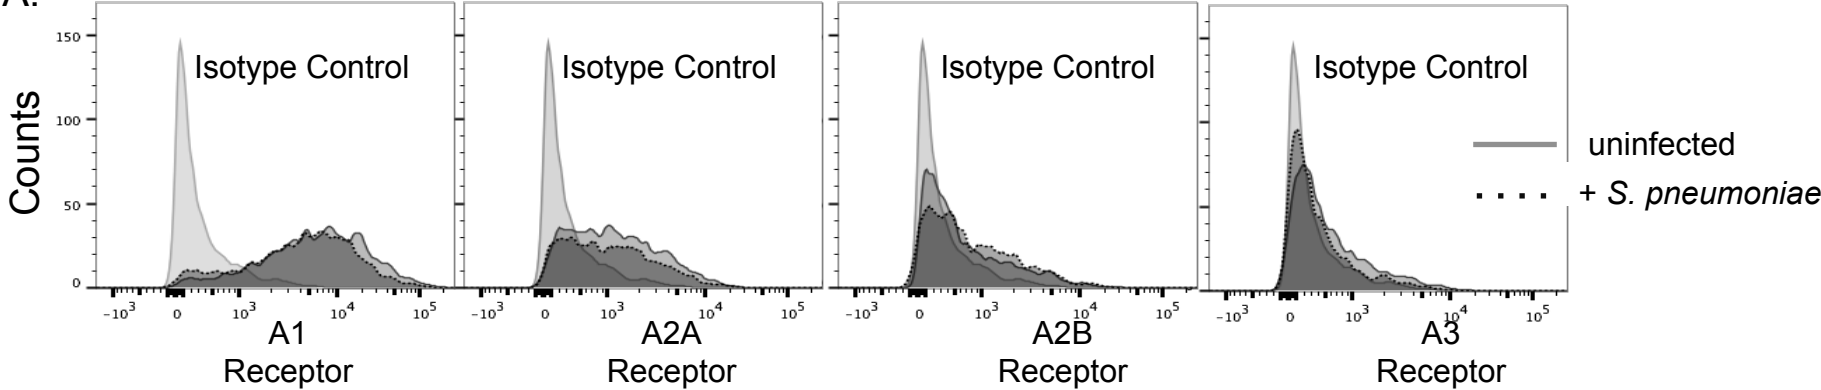

B.

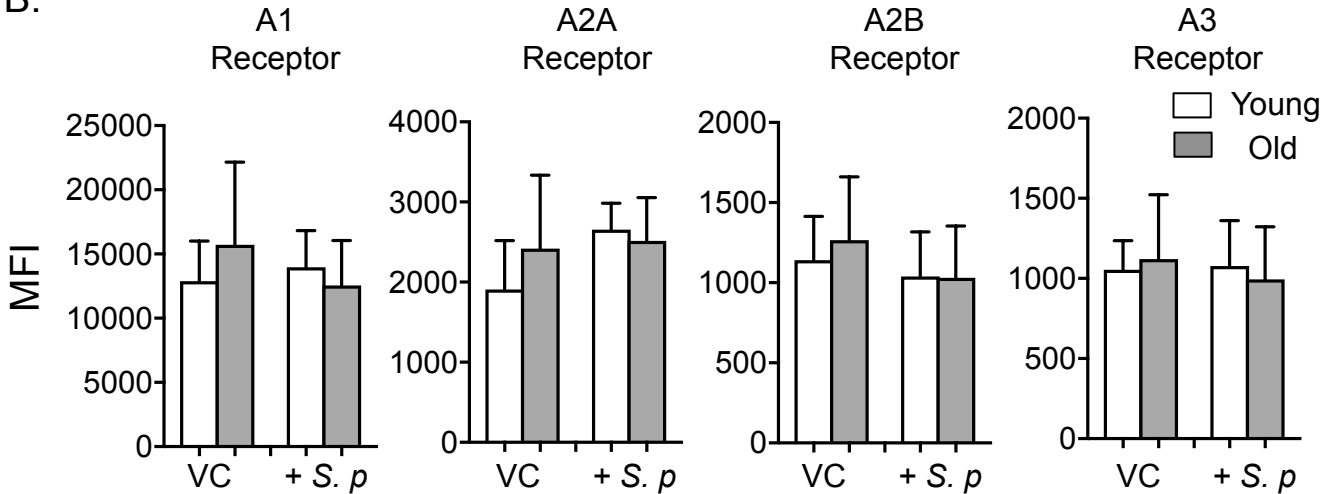

Figure 8

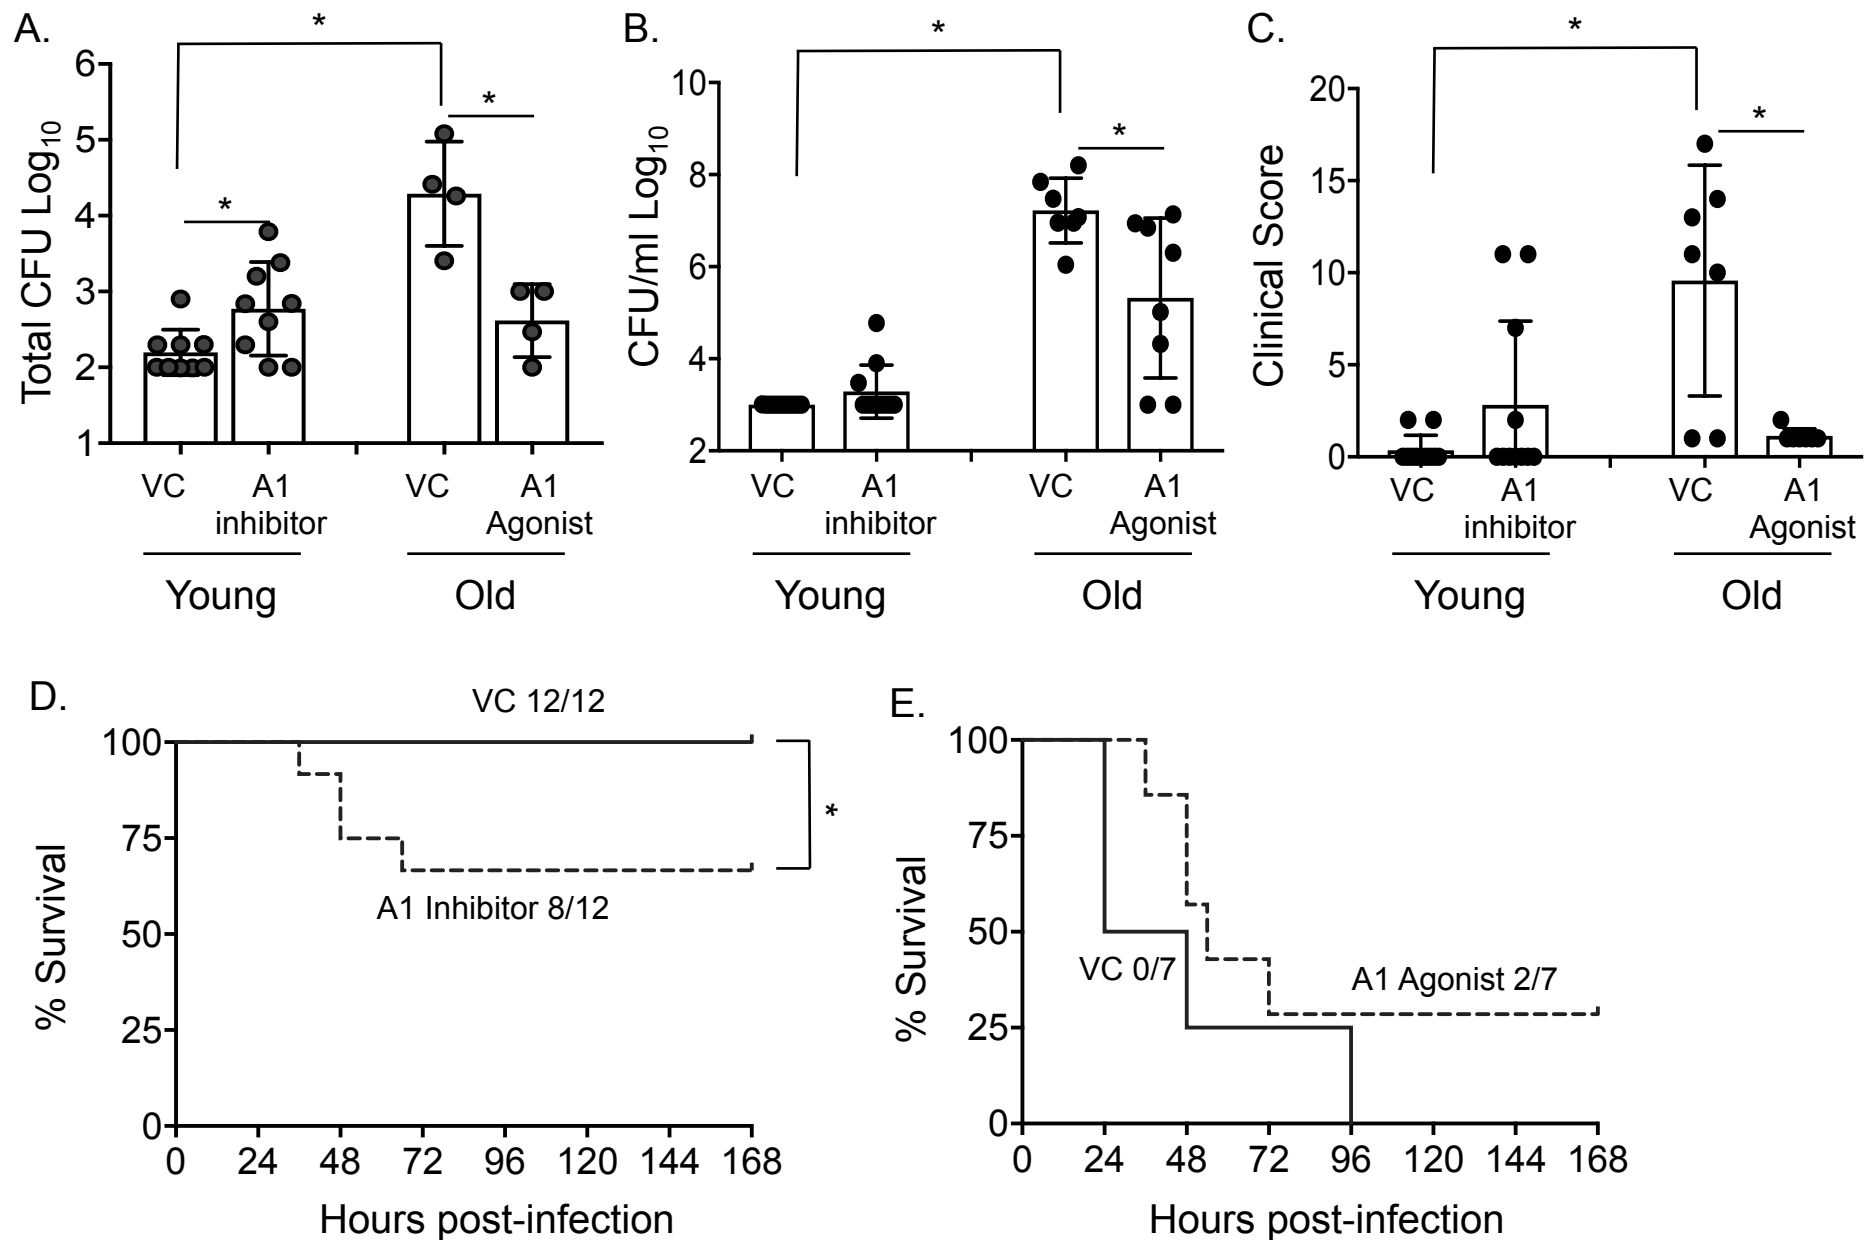

Source: http://biorxiv.org/content/10.1101/670901v1.full.pdf
